# Supplementary material for: BASiCS: Bayesian Analysis of Single-Cell Sequencing Data
Source: PLOS journal article supplement (doi:10.1371/journal.pcbi.1004333), 2015-06-24
Supplement: S5 (10.1371/journal.pcbi.1004333.s005) [file journal.pcbi.1004333.s005]

# S5 Text: Gene ontology enrichment analysis of highly (and lowly) variable genes among the analysed mouse ESC dataset.

## BASiCS: Bayesian Analysis of Single-Cell Sequencing Data

Catalina A. Vallejos<sup>(1),(2)</sup>, John C. Marioni<sup>(2)</sup>, Sylvia Richardson<sup>(1)</sup>

(1) MRC Biostatistics Unit, Institute of Public Health, University Forvie Site, Robinson Way, Cambridge CB2 0SR, United Kingdom

(2) EMBL European Bioinformatics Institute, Cambridge, CB10 1SD, United Kingdom

Table S2: Gene ontology (GO) enrichment analysis of genes detected as highly (or lowly) variably by BASiCS and the methods described in [1] and [2]. Only the 5 GO categories with smallest  $p$ -values are displayed in each case.

| Method          | GO term                                          | Annotated | Significant | Expected | $p$ -value            |
|-----------------|--------------------------------------------------|-----------|-------------|----------|-----------------------|
| BASiCS (LVG)    | Translation                                      | 340       | 101         | 25.87    | $1.8 \times 10^{-19}$ |
|                 | ATP synthesis coupled proton transport           | 14        | 11          | 1.07     | $1.3 \times 10^{-10}$ |
|                 | Translational initiation                         | 68        | 26          | 5.17     | $4.9 \times 10^{-10}$ |
|                 | Binding of sperm to zona pellucida               | 10        | 8           | 0.76     | $4.2 \times 10^{-8}$  |
|                 | Translational elongation                         | 33        | 13          | 2.51     | $3.4 \times 10^{-7}$  |
| BASiCS (HVG)    | Cell differentiation                             | 1017      | 25          | 12.43    | $1.2 \times 10^{-3}$  |
|                 | Regulation of epidermis development              | 19        | 3           | 0.23     | $1.5 \times 10^{-3}$  |
|                 | Brown fat cell differentiation                   | 8         | 2           | 0.1      | $3.9 \times 10^{-3}$  |
|                 | Pyrimidine nucleobase metabolic process          | 8         | 2           | 0.1      | $3.9 \times 10^{-3}$  |
|                 | Pyrimidine-containing compound catabolic process | 8         | 2           | 0.1      | $3.9 \times 10^{-3}$  |
| Islam (HVG)     | Negative regulation of cell proliferation        | 204       | 16          | 3.15     | $1.3 \times 10^{-6}$  |
|                 | Nitric oxide mediated signal transduction        | 5         | 3           | 0.08     | $3.5 \times 10^{-5}$  |
|                 | Cellular response to metal ion                   | 21        | 4           | 0.32     | $2.6 \times 10^{-4}$  |
|                 | Positive regulation of blood pressure            | 9         | 3           | 0.14     | $2.8 \times 10^{-4}$  |
|                 | Regulation of cell growth                        | 114       | 8           | 1.76     | $3.5 \times 10^{-4}$  |
| Brennecke (HVG) | Lung development                                 | 75        | 25          | 10.04    | $7.1 \times 10^{-6}$  |
|                 | Anterior/posterior axis specification            | 26        | 12          | 3.48     | $4.9 \times 10^{-5}$  |
|                 | Somitogenesis                                    | 24        | 11          | 3.21     | $1.1 \times 10^{-4}$  |
|                 | Regulation of cell migration                     | 165       | 47          | 22.08    | $1.5 \times 10^{-4}$  |
|                 | Regulation of embryonic development              | 33        | 13          | 4.42     | $1.7 \times 10^{-4}$  |

## References

- [1] Islam S, Zeisel A, Joost S, La Manno G, Zajac P, et al. (2014) Quantitative single-cell RNA-seq with unique molecular identifiers. *Nature Methods* 11: 163-166.
- [2] Brennecke P, Anders S, Kim JK, Kołodziejczyk AA, Zhang X, et al. (2013) Accounting for technical noise in single-cell RNA-seq experiments. *Nature Methods* 10: 1093-1095.
